# Supplementary material for: Impact of Genetic Background on Neonatal Lethality of Gga2 Gene-Trap Mice
Source: PubMed Central journal article supplement (PMC4025487; doi:10.1534/g3.114.010355), 2014-03-17
Supplement: supp_g3.114.010355_010355SI.pdf [file supp_g3.114.010355_010355SI.pdf]

## **Impact of genetic background on neonatal lethality of *Gga2* knockout mice**

Balraj Doray<sup>1</sup>, Jennifer Govero<sup>1</sup> and Stuart Kornfeld<sup>1,\*</sup>

<sup>1</sup>Department of Internal Medicine, Washington University School of Medicine, St. Louis, MO 63110, USA.

\*To whom correspondence should be addressed. Mailing address: 660 S. Euclid Ave, Campus Box 8125, Department of Internal Medicine, Washington University School of Medicine, St. Louis, MO 63110. E-mail:

[skornfel@dom.wustl.edu](mailto:skornfel@dom.wustl.edu). Phone: (314)-362-8803. Fax: (314)-362-8826.

**DOI: 10.1534/g3.114.010355**

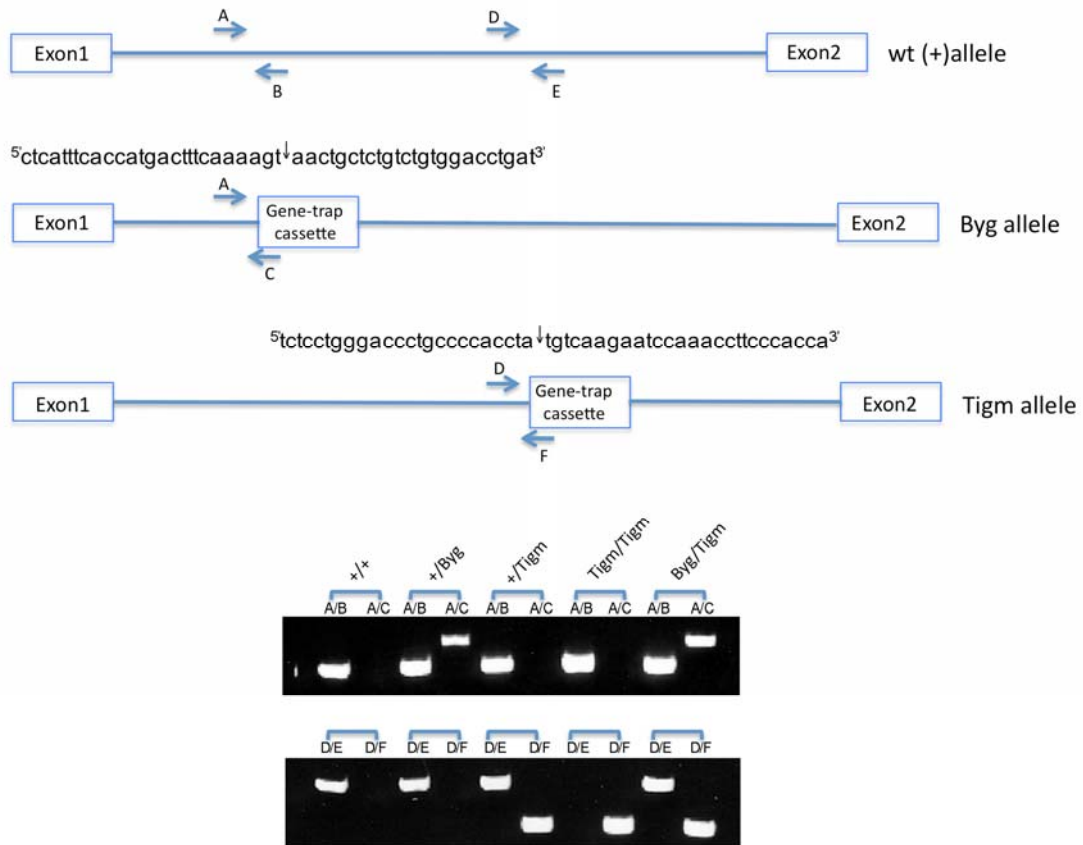

**Figure S1 Genotyping strategy for identifying compound heterozygotes.** Compound heterozygotes harbor 2 different gene-trapped *Gga2* alleles, distinguished from each other by use of the various primer pairs (A/B, A/C, D/E and D/F) shown here. Fifty nucleotides of intronic sequence around each gene-trap cassette are shown. Arrow indicates site of insertion. In the case of the wt allele, only primer sets A/B and D/E will yield PCR products of the correct size. In the presence of the Byg allele, only primer sets A/C and D/E, but not A/B and D/F, will give the correct PCR products. In the presence of the Tigm allele, only primer sets A/B and D/F, but not A/C and D/E, will give the correct PCR products. In the case of the compound het where one copy each of the Byg and Tigm alleles are present, all four primer sets, A/B, A/C, D/E and D/F will yield correct PCR products. Results for Byg/Byg are not shown since no pups having two Byg alleles (Byg/Byg) were ever born.

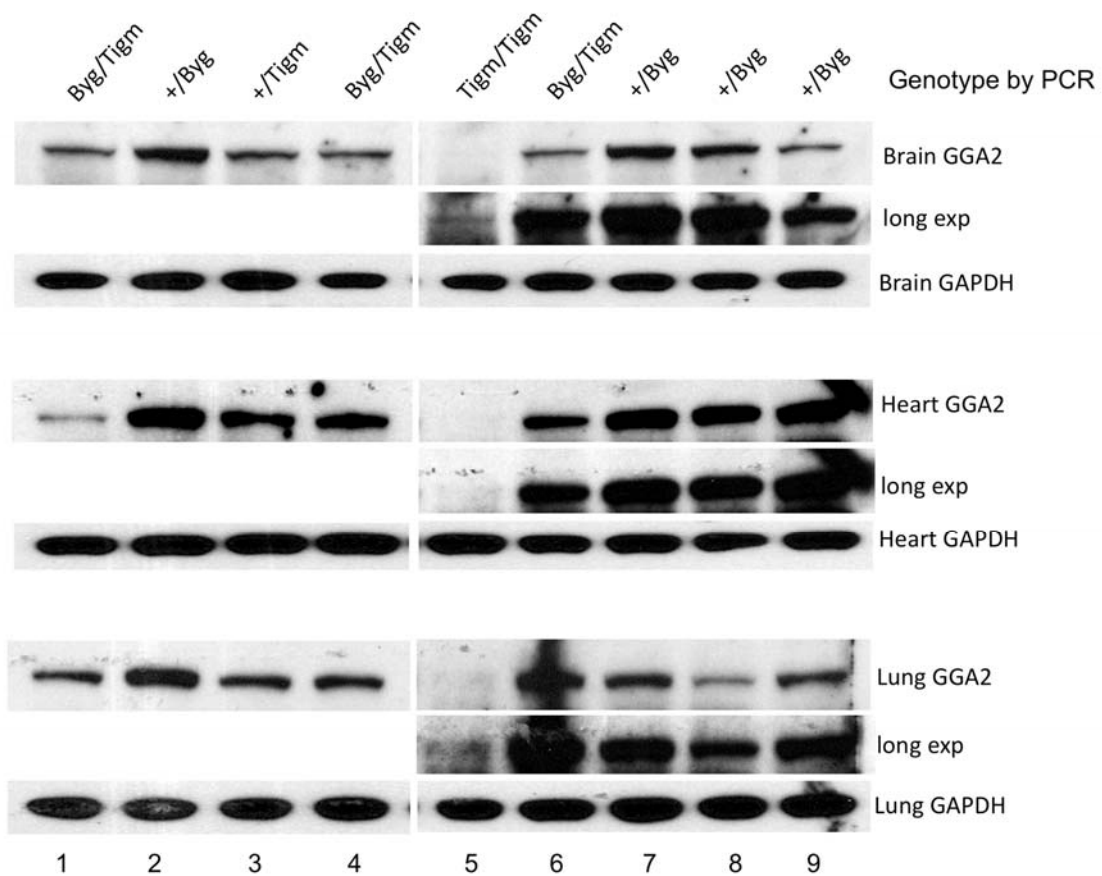

**Figure S2 Tissue expression of GGA2 in mice carrying the Byg allele.** Samples in lanes 1-4 and 5-9 are from pups resulting from the mating schemes shown in Figures 1B and 1C, respectively. 25  $\mu$ g of protein extract for each sample from the different tissues was subjected to SDS-PAGE and immunoblot analysis of GGA2 and GAPDH (5  $\mu$ g of lysate) as a control.

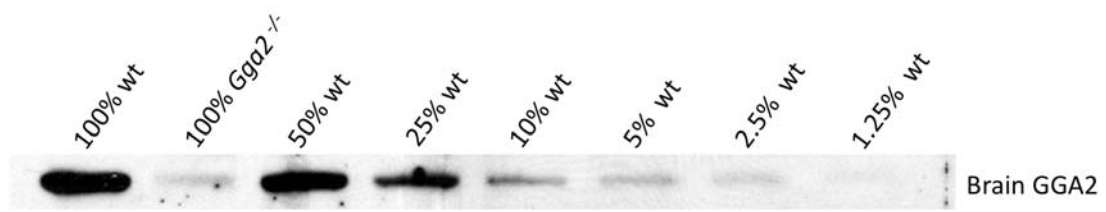

**Figure S3** Detection limit of GGA2 in brain lysates obtained from mixed background mice. 40  $\mu$ g of wt or *Gga2*<sup>-/-</sup> lysate (100%) were loaded alongside 50%, 25%, 10%, 5%, 2.5% and 1.25% of wt lysate, and subjected to SDS-PAGE and immunoblot analysis of GGA2.
