# Supplementary material for: Impact of Genetic Background on Neonatal Lethality of Gga2 Gene-Trap Mice
Source: PubMed Central journal article supplement (PMC4025487; doi:10.1534/g3.114.010355), 2014-03-17
Supplement: supp_g3.114.010355_FigureS2.pdf [file supp_g3.114.010355_FigureS2.pdf]

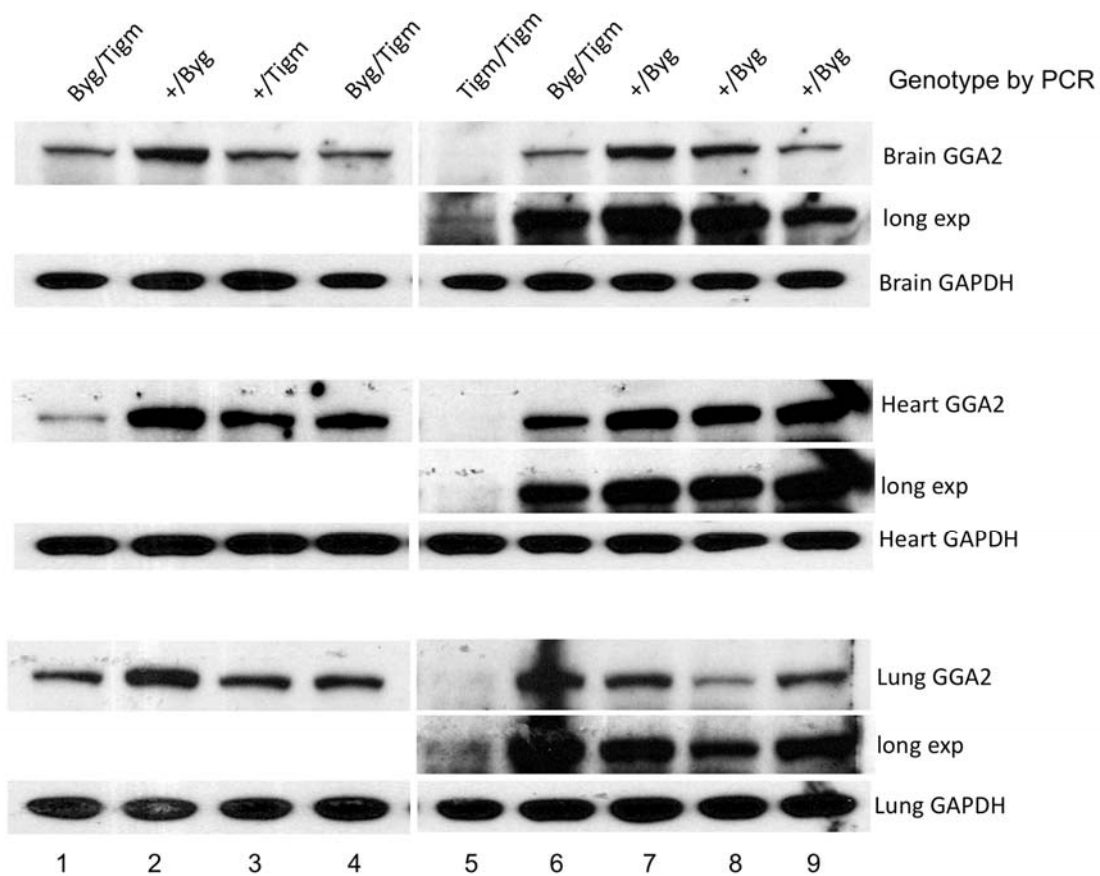

**Figure S2 Tissue expression of GGA2 in mice carrying the Byg allele.** Samples in lanes 1-4 and 5-9 are from pups resulting from the mating schemes shown in Figures 1B and 1C, respectively. 25  $\mu$ g of protein extract for each sample from the different tissues was subjected to SDS-PAGE and immunoblot analysis of GGA2 and GAPDH (5  $\mu$ g of lysate) as a control.
