# Supplementary material for: Impact of Genetic Background on Neonatal Lethality of Gga2 Gene-Trap Mice
Source: PubMed Central journal article supplement (PMC4025487; doi:10.1534/g3.114.010355), 2014-03-17
Supplement: supp_g3.114.010355_FigureS3.pdf [file supp_g3.114.010355_FigureS3.pdf]

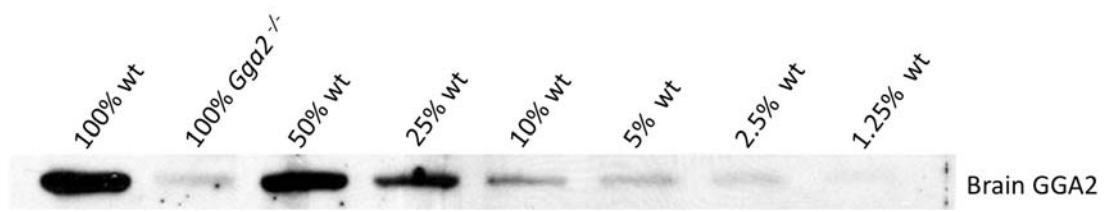

**Figure S3** Detection limit of GGA2 in brain lysates obtained from mixed background mice. 40  $\mu$ g of wt or *Gga2*<sup>-/-</sup> lysate (100%) were loaded alongside 50%, 25%, 10%, 5%, 2.5% and 1.25% of wt lysate, and subjected to SDS-PAGE and immunoblot analysis of GGA2.
